# Supplementary material for: Host-specific assemblages typify gut microbial communities of related insect species
Source: PubMed Central journal article supplement (PMC3979980; doi:10.1186/2193-1801-3-138), 2014-03-11
Supplement: 40064_2014_880_MOESM2_ESM.pdf [file 40064_2014_880_MOESM2_ESM.pdf]

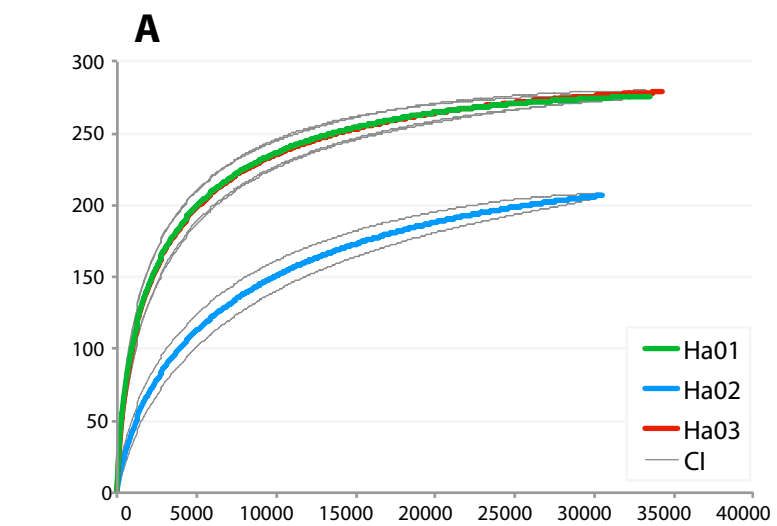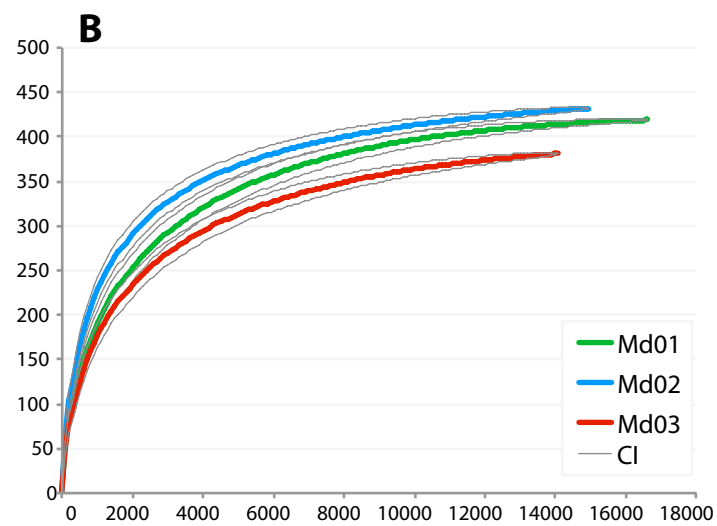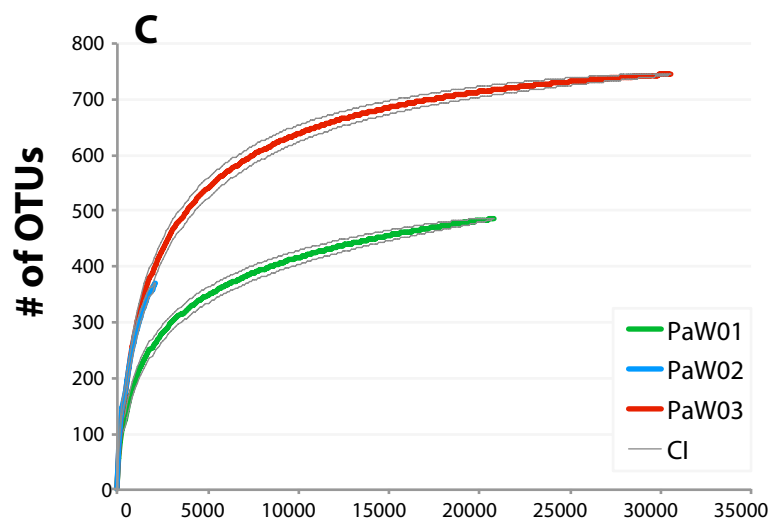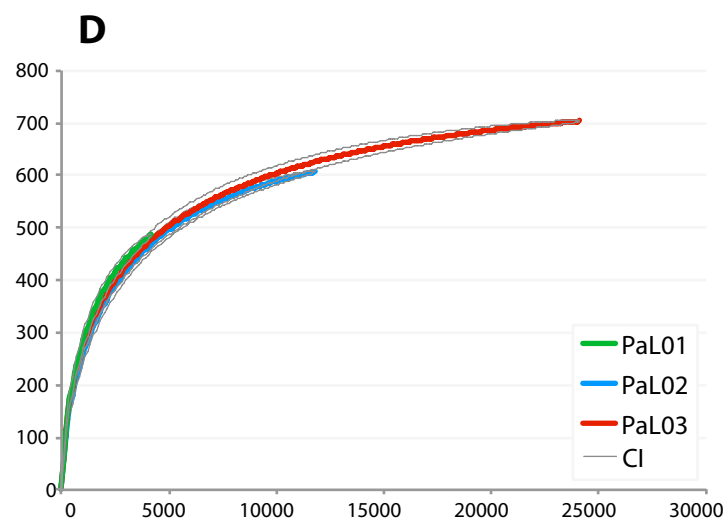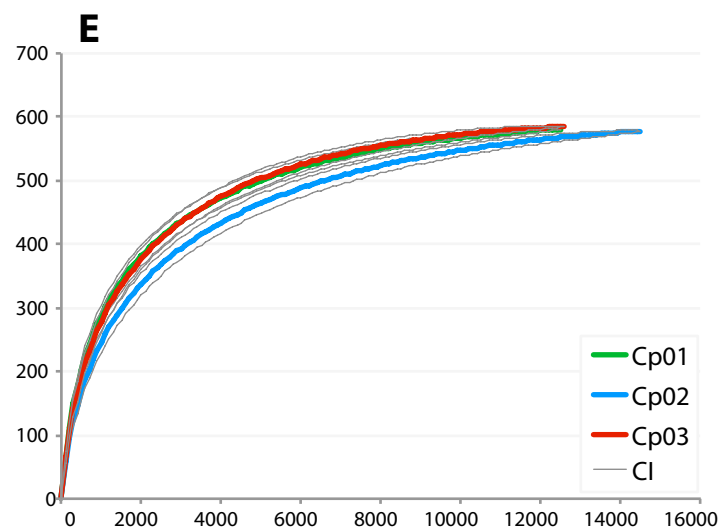

# of pyrotags
